# Supplementary material for: Urban shrinkage impedes carbon scale but increases carbon intensity in China
Source: Research Square preprint supplement (doi:10.21203/rs.3.rs-6297437/v1), 2025-04-18
Supplement: Supplementary file 1 [file 2b214554da783a469edb4cea.docx]

**Supplementary Materials:**

**Data sources and calculation methods**

**Table 1|**Indicators Selection, Calculation Methods, and Data Sources.

| Variable Classification | Variable Meaning | Calculation Method | Data Source |
| --- | --- | --- | --- |
| CEs characteristics | CEs | direct emissions + external energy use | China City Greenhouse Gas Working Group |
| per capita CEs | CEs/permanent population | City Statistical Yearbook, China’s fifth, sixth, and seventh population census |
| CEs per unit of GDP | CEs/GDP | City Statistical Yearbook and Bulletin |
| Energy CEs | The sum of fossil energy multiplied by the CEs conversion coefficient per unit of energy | China City Greenhouse Gas Working Group |
| Characteristics of urban shrinkage | Urban shrinkage rate | (Current period’s permanent population - previous period’s permanent population) / previous period’s permanent population | City Statistical Yearbook, China’s fifth, sixth, and seventh population census |
| Urban shrinkage status | Shrinkage = 1, otherwise = 0 | Calculation results |
| Population density change rate in built-up areas | (Current population density - Previous population density) / Previous population density | WorldPop demographic platform; Resource and Environmental Science Data Platform |
| Human capital characteristics | Human capital level | Number of undergraduates and junior college students/permanent population | City Statistical Yearbook and Bulletin |
| Aging rate1 | Population aged 65 and above/total population | City Statistical Yearbook, China’s fifth, sixth, and seventh population census |
| Urban development characteristics | Urbanization rate | Urban permanent population/total population | City Statistical Yearbook and Bulletin |
| Per capita disposable income | / | City Statistical Yearbook and Bulletin |
| GDP per capita | GDP/permanent population | City Statistical Yearbook and Bulletin |
| Government intervention | Government fiscal general expenditure/regional GDP | City Statistical Yearbook and Bulletin |
| Openness to external markets | Actual foreign investment/regional GDP | City Statistical Yearbook and Bulletin |
| Financial development level | Deposit and loan balance of financial institutions at the end of the year/regional GDP | City Statistical Yearbook and Bulletin |
| Educational development level | Education expenditure/ regional GDP | City Statistical Yearbook and Bulletin |
| Innovation development level | Number of patents granted/ (Science and Technology Expenditure/Regional GDP) | City Statistical Yearbook and Bulletin |
| Environmental development characteristics | Energy efficiency | GDP/Total energy consumption | City Statistical Yearbook and Bulletin |
| Park green space per capita | Park green area/permanent population | City Statistical Yearbook and Bulletin |
| Green coverage rate of built-up areas | Green area of/built-up area | Resource and Environmental Science Data Platform; City Statistical Yearbook |

**Robustness checks**

Notwithstanding comprehensive covariate inclusion, residual endogeneity risks persist due to potential omission of both observable confounders and latent variables. To rigorously resolve these identification challenges, we implement a two-stage instrumental variable (IV) approach. Demographic aging rate is strategically selected as the primary IV for urban shrinkage rate in carbon scale modeling, grounded in its dual qualifications. Specifically, established demographic literature identifies aging rate as a structural determinant of urban shrinkage through labor market contraction and reduced urban vitality2,3 (National Bureau of Statistics, 2023: 60+ population = 21.1%, 65+ = 15.4%, marking moderate aging transition). The aging rate is primarily shaped by historical population policies and the attractiveness of urban areas, while its direct impact on current carbon scale is minimal. This satisfies the exclusivity condition for an effective IV, making the aging rate a robust tool for addressing endogeneity in this analysis.

In the regression model analyzing the relationship between urban shrinkage rate and carbon intensity, we employ financial development level as an IV. Urban shrinkage fundamentally involves the migration and spatial reallocation of capital and labor4,5. Therefore, a decline in financial development level is expected to contribute to SCs. Post-Keynesian economist Stockhammer has noted that, under the shareholder value paradigm, corporate profits are increasingly channeled into acquiring financial assets rather than productive investments, leading to a reduced accumulation rate6. The process of financialization redistributes capital not through the surplus value generated by the real economy but through the direct redistribution of pre-existing wealth7. As financial development becomes progressively detached from the real economy, it is hypothesized to have a minimal direct influence on carbon intensity. This disconnect satisfies the exclusivity condition required for the IV, making financial development level a suitable choice for addressing potential endogeneity in the model.

Table 2 presents the estimation results obtained through the two-stage least squares (2SLS) methodology. M9 and M11 display the first-stage regression results for the carbon scale and carbon intensity, respectively. The regression coefficients for the IV, aging rate and log of financial development level, are 0.863 and 3.75, both of which are statistically significant at the 5% level. The Cragg-Donald Wald F statistic substantially exceeds the critical threshold established by the Stock-Yogo weak instrument test (threshold value = 10), indicating that the model is not affected by weak IV issues. Additionally, the Anderson LM test robustly rejects the null hypothesis of “insufficient identification of IV”, further confirming that the model is free from identification insufficiency. This demonstrates that the IV possesses substantial explanatory power for the endogenous variables. The second-stage regression results reveal that urban shrinkage rate has a significantly negative regression coefficient with respect to carbon scale, while its coefficient for carbon intensity is positive, with both achieving statistical significance. These findings validate the suitability of using the aging rate and log of financial development level as IVs for analyzing the scale and intensity of CEs, respectively, thereby strengthening the reliability of the model’s conclusions.

**Table 2**|IV Regression.

|  | M9 | M10 | M11 | M12 |
| --- | --- | --- | --- | --- |
|  | Phase 1 | Phase 2 | Phase 1 | Phase 2 |
| Variables | urban shrinkage rate | Log of carbon scale | urban shrinkage rate | Log of carbon intensity |
| AR | 0.863***  (3.52) |  |  |  |
| Log of financial development level |  |  | 3.75***  (2.62) |  |
| urban shrinkage rate |  | -0.027**  (-2.08) |  | 0.17***  (2.98) |
| Cragg-Donald Wald F | 56.33 |  | 23.13 |  |
| Kleibergen-Paap rk LM | 17.96 |  | 7.00 |  |
| Controls | Yes | Yes | Yes | Yes |
| City/Year FE | Yes | Yes | Yes | Yes |
| Observations | 1,152 | 1,152 | 1,152 | 1,152 |

Standardized beta coefficients; t statistics in parentheses. *** *P*<0.01, ** *P*<0.05, * *P*<0.1

The built-up area population density change rate was used as a proxy for urban shrinkage rate to conduct robustness testing (Table 3). M13 and M14 showed that the estimated coefficient for carbon scale was 0.661, while the coefficient for carbon intensity was -0.978; both coefficients were statistically significant at the 1% level. These results are consistent with the baseline regression findings, where the primary explanatory variable was the urban shrinkage rate, and the alternative variable was the population density change rate in built-up areas, yielding opposite signs. This consistency indicates that the research conclusions remain robust despite variations in the calculation methods for the core explanatory variables. To further test robustness, the energy CEs was employed as a substitute for the carbon scale, and the per capita CEs was used in place of the carbon intensity. The results, as detailed in M15-M16, show a regression coefficient of -0.00587 for the former, significant at the 5% level, and 0.00588 for the latter, significant at the 5% level. These outcomes are consistent with the baseline regression results, further corroborating the robustness of the findings. Additionally, GDP per capita, recognized in existing literature as a significant control variable influencing CEs, was incorporated to address potential omission. The estimated values in M17-M18 remain consistent with the baseline regression, supporting the validity of the conclusions.

**Table 3**|Robustness Test Results.

|  | M13 | M14 | M15 | M16 | M17 | M18 |
| --- | --- | --- | --- | --- | --- | --- |
|  | Substituting the primary explanatory variable | | Altering the dependent variable | | Incorporating an additional control variable | |
| Variables | Log of carbon scale | Log of carbon intensity | Log of energy CEs | Log of per capita CEs | Log of carbon scale | Log of carbon intensity |
| population density change rate | 0.661***  (4.28) | -0.978***  (-5.94) |  |  |  |  |
| urban shrinkage rate |  |  | -0.00587** | 0.00588** | -0.00480** | 0.00605*** |
|  |  |  | (-2.28) | (2.41) | (-2.13) | (2.70) |
| Log of GDP per capita |  |  |  |  | 0.352***  (10.23) | -0.564***  (-16.53) |
| Constant | 6.561*** | 5.035*** | 6.911*** | 1.174*** | 7.311*** | 3.889*** |
|  | (42.37) | (30.54) | (50.46) | (9.02) | (58.81) | (31.49) |
| Controls | Yes | Yes | Yes | Yes | Yes | Yes |
| City/Year FE | Yes | Yes | Yes | Yes | Yes | Yes |
| Observations | 1,152 | 1,152 | 1,152 | 1,152 | 1,152 | 1,152 |
| R-squared | 0.473 | 0.542 | 0.350 | 0.425 | 0.524 | 0.641 |

Standardized beta coefficients; t statistics in parentheses. *** *P*<0.01, ** *P*<0.05, * *P*<0.1

**Moderating effect results**

**Table 4**|Results of the Interactive Regression Model.

|  | M19 | M20 | M21 |
| --- | --- | --- | --- |
| Variables | Log of carbon scale | Log of carbon scale | Log of carbon scale |
| urban shrinkage rate | -0.00351 | -0.00541** | -0.00497** |
|  | (-1.45) | (-2.26) | (-2.08) |
| urban shrinkage rate×energy efficiency | 0.000552*** |  |  |
|  | (2.97) |  |  |
| urban shrinkage rate×Green coverage rate of built-up areas |  | -0.000566** |  |
|  |  | (-2.12) |  |
| urban shrinkage rate×Log of park green space per capita |  |  | -0.00963** |
|  |  |  | (-2.09) |
| Constant | 6.980*** | 6.985*** | 6.970*** |
|  | (55.16) | (55.05) | (54.91) |
| Controls | Yes | Yes | Yes |
| City/Year FE | Yes | Yes | Yes |
| Observations | 1,152 | 1,152 | 1,152 |
| R-squared | 0.470 | 0.468 | 0.468 |

Standardized beta coefficients; t statistics in parentheses. *** *P*<0.01, ** *P*<0.05, * *P*<0.1

**Heterogeneity analysis**

We investigate the effects of urban shrinkage rate on the carbon scale and carbon intensity in China, considering the considerable variations in urbanization processes, population scale, and CEs across cities of different regions and sizes (M22-M35). The classification of regions into eastern, central, and western categories is informed by the criteria established in the Outline of the Tenth Five-Year Plan for National Economic and Social Development of the People’s Republic of China, published in 2000. The classification of cities is based on the “Notice on Adjusting the Standards for Classification of City Scale”, issued by the State Council in 2014. This framework categorizes cities into five distinct types is based on population: small cities (population < 500,000), medium-sized cities (population between 500,000 and 1,000,000), large cities (population ≥ 1 million but < 5 million), megacities (population ≥ 5 million but < 10 million), and supercities (population ≥ 10 million). Given the timing of the standard’s release and the subsequent rapid population growth, the representation of small cities within prefecture-level cities has decreased. As a result, the analysis focuses on medium-sized, large, mega, and super cities8. Despite the differing classification methodologies, the findings consistently indicate similar impacts on both scale and intensity, corroborating the baseline regression results and reinforcing the robustness of the model estimation (Table 5).

**Table 5**|Results of Heterogeneity Analysis.

| Model Number | Level/Region | Variables | urban shrinkage rate | Constant | R2 | Controls | City/Year FE | Observations |
| --- | --- | --- | --- | --- | --- | --- | --- | --- |
| M22 | Eastern Region | Log of carbon scale | -0.000763  (-0.13) | 7.321***  (27.35) | 0.486 | Yes | Yes | 400 |
| M23 | Central Region | Log of carbon scale | -0.0101***  (-2.92) | 6.644***  (32.08) | 0.534 | Yes | Yes | 400 |
| M24 | Western Region | Log of carbon scale | -0.00175  (-0.39) | 6.853***  (30.71) | 0.456 | Yes | Yes | 352 |
| M25 | Eastern Region | Log of carbon intensity | 0.00318  (0.57) | 3.463***  (13.32) | 0.543 | Yes | Yes | 400 |
| M26 | Central Region | Log of carbon intensity | 0.0106**  (2.52) | 4.184***  (16.67) | 0.571 | Yes | Yes | 400 |
| M27 | Western Region | Log of carbon intensity | 0.00546  (1.19) | 4.776***  (20.99) | 0.574 | Yes | Yes | 352 |
| M28 | Medium-sized cities | Log of carbon scale | -0.0622*  (-1.90) | 7.288***  (3.42) | 0.757 | Yes | Yes | 36 |
| M29 | Large cities | Log of carbon scale | -0.00685**  (-2.34) | 6.862***  (41.90) | 0.470 | Yes | Yes | 753 |
| M30 | Megacities | Log of carbon scale | -0.00242  （-0.47） | 7.365***  （31.02） | 0.565 | Yes | Yes | 294 |
| M31 | Supercities | Log of carbon scale | -0.0067  (-1.24) | 7.127***  (-26.07) | 0.469 | Yes | Yes | 55 |
| M32 | Medium-sized cities | Log of carbon intensity | -0.0384  (-1.62) | 7.675***  (11.69) | 0.676 | Yes | Yes | 36 |
| M33 | Large cities | Log of carbon intensity | 0.00621**  (1.97) | 4.511***  (25.50) | 0.507 | Yes | Yes | 753 |
| M34 | Megacities | Log of carbon intensity | 0.00374  （0.61） | 4.341***  （15.24） | 0.625 | Yes | Yes | 294 |
| M35 | Supercities | Log of carbon intensity | 0.0372*  (2.09) | 2.955***  (4.57) | 0.887 | Yes | Yes | 55 |

Standardized beta coefficients; t statistics in parentheses. *** *P*<0.01, ** *P*<0.05, * *P*<0.1

**Causal Effect Analysis**

To address the endogenous issue of reverse causality, we employ a Difference-in-Differences (DID) model for causal analysis. Since urban shrinkage is not a strictly randomized phenomenon, quasi-natural experimental design is essential prior to conducting the analysis. In this framework, cities experiencing shrinkage are designated as the treatment group, while cities not undergoing shrinkage serve as the control group. urban shrinkage arises from a range of factors, including globalization, deindustrialization, post-socialist transformation, the global financial crisis, suburbanization, political circumstances, and institutional changes9,10. However, in China, urban shrinkage is primarily driven by specific exogenous shocks. These include the transformation of economic and industrial structures in resource-dependent cities, regional functional restructuring, and the decline of smaller cities due to the economic pull of larger urban centers5. Such conditions satisfy the exogeneity requirement for causal analysis. The study sample is confined to prefecture-level cities. A heterogeneity analysis reveals that, based on city-level classifications, most of these cities fall into the categories of large or mega cities. This classification enhances the comparability between the treatment and control groups, ensuring the robustness of the analysis.

Utilizing SCs as quasi-experimental cases in comparison to NSCs, the differences-in-differences method (DID) is employed to investigate the potential causal relationship between urban shrinkage and CEs. In this analysis, cities that have experienced shrinkage are designated as the experimental group, while those that have not are classified as the control group. The number of cities in the control group and experimental group is different in different years. It is important to note that the onset of shrinkage varies across cities; for instance, certain cities initially categorized as part of the reference group may transition to the experimental group in subsequent stages. To account for this temporal variation, a continuous time DID model is applied for estimation, with the model specifications outlined in Formula 1.

In the specified formula, the dummy variable *ST* serves to identify whether a city is part of the experimental group. A value of 1 is assigned to cities that experienced a contraction phenomenon between the years 2005 and 2020, while a value of 0 is assigned to those that did not. Additionally, the dummy variable time denotes the temporal occurrence of the shrinkage phenomenon, with a value of 1 assigned to the year in which the phenomenon took place and all subsequent years and a value of 0 assigned to the years preceding the event. The interpretations of the other symbols remain consistent with the aforementioned definitions.

Table 6 reports the results of the causal effect regression analysis. The findings indicate that the estimated coefficient of urban shrinkage rate on carbon scale is not statistically significant (M36). However, M37 shows that the estimated coefficient of urban shrinkage rate on carbon intensity is 0.0817, which is significant at the 1% level. This result suggests that urban shrinkage is positively associated with an increase in carbon intensity, establishing a causal relationship between the two variables. M38, which employs an alternative dependent variable, provides robust and consistent results. It is important to emphasize that the validity of the DID estimation relies on the satisfaction of the parallel trend assumption11. A parallel trend analysis was conducted on the carbon intensity, as shown in Figure 5. The results revealed no significant findings prior to urban shrinkage; however, post-urban shrinkage, the results became significant. Additionally, a parallel trend test was performed on per capita CEs, as depicted in Figure 1. This analysis not only showed significant changes before and after urban shrinkage but also revealed a shift in the sign of the coefficient following urban shrinkage. Therefore, the DID model used in our study satisfies the required conditions for the parallel trend assumption.

**Table 6**|Results of Causal Effect Analysis.

|  | M36 | M37 | M38 |
| --- | --- | --- | --- |
| Variables | Log of carbon scale | Log of carbon intensity | Log of per capita CEs |
| Urban shrinkage status×urban shrinkage rate | 0.000896  (0.04) | 0.0817***  (3.46) | 0.0707***  (3.03) |
| Constant | 7.817***  (46.00) | 2.165***  (12.06) | 3.206***  (17.63) |
| Controls | Yes | Yes | Yes |
| City/Year FE | Yes | Yes | Yes |
| Observations | 1,152 | 1,152 | 1,152 |
| R-squared | 0.921 | 0.908 | 0.873 |

Standardized beta coefficients; t statistics in parentheses. *** *P*<0.01, ** *P*<0.05, * *P*<0.1

**Figure 1 Results of Parallel Trend Test of carbon intensity and per capita CEs.** The yellow line in the figure is the parallel trend test result of the impact of urban shrinkage on carbon intensity; the blue line is the parallel trend test result of the impact of urban shrinkage on per capita CEs.

**References**

1. Du, J., Li, B. & Yang, H. Impact of agricultural human capital on agricultural green total factor productivity under population aging. *China Population,Resources and Environment* **33**, 215-228 (2023).

2. Escudero-Gómez, L.A., García-González, J.A. & Martínez-Navarro, J.M. What is happening in shrinking medium-sized cities? A correlational analysis and a multiple linear regression model on the case of Spain. *Cities* **134**, 104205 (2023).

3. Hattori, K., Kaido, K. & Matsuyuki, M. The development of urban shrinkage discourse and policy response in Japan. *Cities* **69**, 124-132 (2017).

4. Li, X. Academic debates upon shrinking cities in China for sustainabledevelopment. *Geographical Research* **36**, 1997-2016 (2017).

5. Sun, P. Urban shrinkage: Connotation-sinicization-framework of analysis. *Progress in Geography.* **41**, 1478-1491 (2022).

6. Stockhammer, E. Financialisation and the slowdown of accumulation. *Cambridge J. Econ.* **28**, 719-741 (2004).

7. Gao, F. Financialized globalized monopoly capitalism and the global financial-economic crisis. *Foreign Theoretical Trends.* 39-45 (2011).

8. Han, S., Miao, C. & Li, Y. Effects of urban polycentric spatial structure on carbon emissions in the Yellow River Basin. *Geographical Research* **42**, 936-954 (2023).

9. Schetke, S. & Haase, D. Multi-criteria assessment of socio-environmental aspects in shrinking cities. Experiences from eastern Germany. *Environ. Impact Assess. Rev.* **28**, 483-503 (2008).

10. Wiechmann, T. & Pallagst, K.M. Urban shrinkage in Germany and the USA: A Comparison of Transformation Patterns and Local Strategies. *Int. J. Urban Reg. Res.* **36**, 261-280 (2012).

11. Yu, Y. & Zhang, S. Urban Housing Prices, Purchase Restriction Policy and TechnologicalInnovation. *China Industrial Economics* 98-116 (2017).
